# Supplementary material
Source: HighWire-hosted journal article supplement (http://ajnr-stage2.highwire.org/highwire/filestream/52301/field_highwire_adjunct_files/0/2756_table.pdf)
Supplement: 2756_table.pdf [file 2756_table.pdf]

**On-line Table: Assessment scale proposed by the JOA**

| Score                                    | Description                                                |
|------------------------------------------|------------------------------------------------------------|
| I) Motor dysfunction of upper extremity  |                                                            |
| 0                                        | Unable to feed oneself                                     |
| 1                                        | Unable to handle chopsticks, able to eat with spoon        |
| 2                                        | Handle chopsticks with much difficulty                     |
| 3                                        | Handle chopsticks with slight difficulty                   |
| 4                                        | None                                                       |
| II) Motor dysfunction of lower extremity |                                                            |
| 0                                        | Unable to walk                                             |
| 1                                        | Walk with walking aid                                      |
| 2                                        | Able to go up or down stairs with handrail for support     |
| 3                                        | Lack of stability and smooth reciprocation                 |
| 4                                        | None                                                       |
| III) Sensory deficit                     |                                                            |
| A) Upper extremity                       |                                                            |
| 0                                        | Severe sensory loss of pain                                |
| 1                                        | Mild sensory loss                                          |
| 2                                        | None                                                       |
| B) Lower extremity, same as A            |                                                            |
| C) Trunk, same as A                      |                                                            |
| IV) Sphincter dysfunction                |                                                            |
| 0                                        | Unable to void                                             |
| 1                                        | Marked difficulty in micturition (pollakiuria, hesitation) |
| 2                                        | Difficulty in micturition (pollakiuria, hesitation)        |
| 3                                        | None                                                       |
